# Supplementary material
Source: publisher figshare collection journal article supplement (https://sage.figshare.com/ndownloader/files/20152538)

## Appendices

### Appendix 1 – Demographics

| Age | Sex | Staus       | Ethnicity | Education | Time from Dx Months |
|-----|-----|-------------|-----------|-----------|---------------------|
| 68  | M   | Married     | NZE       | Tertiary  | 18                  |
| 80  | F   | Married     | NZE       | Tertiary  | 24                  |
| 70  | F   | Married     | NZE       | Secondary | 12                  |
| 61  | M   | Married     | NZE       | Secondary | 264                 |
| 90  | F   | Married     | NZE       | Secondary | 5                   |
| 75  | M   | Married     | NZE       | Secondary | 30                  |
|     | F   | Lives alone | Maori     | Secondary | 252                 |
| 55  | F   | Married     | NZE       | Tertiary  | 5                   |
| 90  | M   | Married     | NZE       | Secondary |                     |
| 81  | F   | Lives alone | NZE       | Secondary | 7                   |
| 84  | M   | Married     | NZE       | Tertiary  | 18                  |
| 90  | F   | Lives alone | NZE       | Secondary | 9                   |
| 81  | M   | Married     | NZE       | Secondary | 24                  |
| 55  | F   | Married     | Maori     | Tertiary  | 12                  |
| 71  | F   | Married     | NZE       | Secondary | 120                 |
| 86  | F   | Lives alone | NZE       | Secondary | 24                  |
| 92  | M   | Lives alone | Maori     | Primary   | 18                  |
| 73  | M   | M           | NZE       | Tertiary  | 9                   |
| 76  | M   | Married     | NZE       | Secondary | 30                  |
| 70  | F   | Married     | NZE       | Tertiary  | 20                  |
| 83  | M   | Married     | NZE       | Secondary | 120                 |
| 92  | F   | Married     | NZE       | Secondary | 1                   |

## Appendix 2 - Religious Commitment Inventory – 10 data and total scores

[illegible]

### Appendix 3 – Death and Dying Distress Score (DADDs) – data and total scores

| Undone | Unsaid | Unachieved | Uncertain | Futureless | MissedOpps | TimeGoing | Burden | Impact | OwnDeath | Suddenly | Prolonged | Alone | Painful | Soon |
|--------|--------|------------|-----------|------------|------------|-----------|--------|--------|----------|----------|-----------|-------|---------|------|
| 3      | 0      | 1          | 1         | 3          | 2          | 2         | 3      | 4      | 1        | 1        | 3         | 1     | 2       | 1    |
| 0      | 0      | 0          | 0         | 0          | 1          | 0         | 0      | 0      | 0        | 0        | 0         | 0     | 0       | 0    |
| 0      | 0      | 0          | 3         | 4          | 4          | 4         | 5      | 5      | 4        | 5        | 1         | 5     | 1       | 3    |
| 4      | 2      | 2          | 2         | 1          | 1          | 1         | 3      | 1      | 1        | 3        | 0         | 0     | 0       | 4    |
| 0      | 0      | 0          | 0         | 0          | 0          | 0         | 0      | 0      | 0        | 0        | 0         | 0     | 0       | 0    |
| 4      | 1      | 4          | 2         | 2          | 3          | 2         | 3      | 3      | 2        | 2        | 2         | 1     | 3       | 2    |
| 4      | 2      | 3          | 1         | 1          | 3          | 1         | 5      | 5      | 1        | 1        | 3         | 1     | 3       | 1    |
| 0      | 2      | 0          | 3         | 3          | 0          | 3         | 3      | 4      | 3        | 0        | 0         | 0     | 3       | 0    |
| 2      | 2      | 2          | 4         | 2          | 4          | 2         | 5      | 5      | 4        | 0        | 5         | 5     | 5       | 5    |
| 2      | 2      | 1          | 3         | 1          | 2          | 1         | 4      | 4      | 4        | 4        | 4         | 4     | 4       | 1    |
| 3      | 4      | 2          | 2         | 1          | 4          | 1         | 4      | 5      | 5        | 1        | 5         | 2     | 4       | 1    |
| 3      | 2      | 0          | 0         | 2          | 1          | 1         | 4      | 3      | 3        | 0        | 2         | 0     | 2       | 1    |
| 0      | 0      | 0          | 0         | 0          | 0          | 0         | 0      | 3      | 0        | 0        | 0         | 3     | 4       | 0    |
| 5      | 1      | 5          | 0         | 0          | 5          | 0         | 0      | 0      | 0        | 0        | 5         | 0     | 5       | 0    |
| 3      | 0      | 2          | 0         | 1          | 1          | 0         | 3      | 1      | 1        | 0        | 0         | 0     | 0       | 0    |
| 2      | 2      | 2          | 3         | 3          | 2          | 2         | 2      | 3      | 3        | 3        | 3         | 4     | 4       | 2    |
| 2      | 0      | 1          | 0         | 0          | 2          | 1         | 1      | 3      | 0        | 0        | 1         | 2     | 1       | 0    |
| 5      | 2      | 3          | 5         | 5          | 4          | 4         | 4      | 5      | 5        | 5        | 3         | 5     | 5       | 5    |
| 2      | 0      | 0          | 0         | 0          | 0          | 0         | 2      | 3      | 0        | 0        | 0         | 0     | 2       | 0    |
| 1      | 0      | 0          | 0         | 1          | 1          | 0         | 3      | 3      | 3        | 2        | 4         | 4     | 5       | 3    |
| 0      | 0      | 0          | 0         | 0          | 0          | 0         | 0      | 5      | 2        | 0        | 0         | 0     | 0       | 0    |
| 0      | 1      | 0          | 0         | 0          | 0          | 0         | 0      | 0      | 0        | 2        | 0         | 0     | 0       | 0    |
| 45     | 23     | 28         | 29        | 30         | 40         | 25        | 54     | 66     | 42       | 29       | 41        | 37    | 53      | 29   |

#### Appendix 4 – Hope Herth Index (HHI) – data and total scores

| Positive | Goals | Alone | Possibilities | Faith | Afraid | joyfulmems | InnerStren | Love | Direction | Potential | Value | SCORE |
|----------|-------|-------|---------------|-------|--------|------------|------------|------|-----------|-----------|-------|-------|
| 4        | 4     | 4     | 4             | 1     | 3      | 4          | 4          | 4    | 4         | 4         | 4     | 44    |
| 3        | 3     | 4     | 3             | 3     | 3      | 3          | 3          | 3    | 3         | 3         | 3     | 37    |
| 4        | 4     | 2     | 2             | 3     | 2      | 3          | 3          | 4    | 3         | 2         | 3     | 35    |
| 3        | 4     | 4     | 3             | 1     | 4      | 4          | 4          | 3    | 4         | 4         | 4     | 42    |
| 4        | 2     | 4     | 3             | 3     | 4      | 4          | 4          | 4    | 3         | 3         | 4     | 42    |
| 3        | 3     | 3     | 3             | 2     | 3      | 4          | 3          | 3    | 3         | 4         | 4     | 38    |
| 4        | 2     | 2     | 3             | 4     | 4      | 4          | 4          | 4    | 3         | 4         | 4     | 42    |
| 4        | 3     | 3     | 3             | 4     | 3      | 4          | 4          | 4    | 3         | 3         | 3     | 41    |
| 3        | 3     | 3     | 3             | 3     | 3      | 2          | 3          | 3    | 3         | 3         | 3     | 35    |
| 4        | 3     | 3     | 2             | 2     | 2      | 4          | 3          | 4    | 3         | 3         | 3     | 36    |
| 3        | 1     | 3     | 3             | 3     | 3      | 3          | 3          | 4    | 3         | 3         | 3     | 35    |
| 3        | 3     | 2     | 3             | 2     | 3      | 3          | 3          | 3    | 3         | 2         | 2     | 32    |
| 2        | 1     | 4     | 1             | 2     | 4      | 4          | 3          | 4    | 1         | 3         | 3     | 32    |
| 4        | 4     | 4     | 4             | 4     | 4      | 3          | 4          | 4    | 4         | 2         | 4     | 45    |
| 3        | 3     | 4     | 3             | 1     | 3      | 4          | 3          | 3    | 3         | 3         | 3     | 36    |
| 4        | 3     | 3     | 3             | 3     | 3      | 4          | 4          | 3    | 3         | 3         | 3     | 39    |
| 3        | 3     | 2     | 3             | 1     | 3      | 4          | 3          | 4    | 3         | 3         | 3     | 35    |
| 3        | 3     | 3     | 3             | 3     | 2      | 3          | 3          | 4    | 3         | 3         | 3     | 36    |
| 3        | 3     | 4     | 4             | 4     | 4      | 4          | 4          | 4    | 4         | 4         | 3     | 45    |
| 3        | 3     | 3     | 3             | 4     | 4      | 4          | 4          | 3    | 4         | 3         | 3     | 41    |
| 3        | 2     | 3     | 2             | 1     | 3      | 4          | 3          | 3    | 3         | 2         | 3     | 32    |
| 4        | 4     | 1     | 3             | 1     | 1      | 4          | 4          | 4    | 4         | 4         | 4     | 38    |
| 74       | 64    | 68    | 61            | 55    | 68     | 80         | 76         | 79   | 70        | 68        | 72    | 38.1  |

## Appendix 5 – TABLES

Table 1 – Religiosity Commitment Inventory – 10 (RCI-10) Questionnaire

- 1 - I often read books and magazines about my faith
- 2 - I make financial contributions to my religious organization
- 3 - I spend time trying to grow in understanding of my faith
- 4 - Religion is especially important to me because it answers many questions about the meaning of life
- 5 – My religious beliefs lie behind my whole approach to life
- 6 - I enjoy spending time with others of my religious affiliation
- 7 - Religious beliefs influence all my dealings in life
- 8 - It is important to me to spend periods of time in private religious thought and reflection.
- 9 - I enjoy working in the activities of my religious affiliation.
- 10 - I keep well-informed about my local religious group and I have some influence in its decisions.

Please add any comments on your own religious beliefs (if any):

## Table 2 – Death and Dying Distress Score (DADDS) – Questionnaire

Over the past 2 weeks how distressed did you feel about:

- 1 - Not having done all the things I wanted to do
- 2 - Not having said all the things I wanted to say to the people I care about
- 3 - Not having achieved my life's goals and ambitions
- 4 - Not knowing what will happen to me near the end of life
- 5 - Not having a future
- 6 - The missed opportunities in my life
- 7 - Running out of time
- 8 - Being a burden to others
- 9 - The impact of my death on my loved ones
- 10 - My own death and dying

Over the past 2 weeks how many times have you been concerned that dying may:

- 11 - Happen suddenly or unexpectedly
- 12 - Be prolonged or drawn out
- 13 - Happen when I am alone
- 14 - Happen with a lot of pain or suffering
- 15 - Happen very soon

## Table 3 – Hope Herth Index

- 1 - I have a positive outlook towards life
- 2 - I have short and/or long range goals
- 3 - I feel all alone
- 4 - I can see possibilities in the midst of difficulties
- 5 - I have a faith that gives me comfort
- 6 - I feel scared about my future
- 7 - I can recall happy/joyful times
- 8 - I have deep inner strength
- 9 - I am able to give/receive caring and love

Appendix 6 – CHARTS NOT IN MAIN TEXT

Supplementary Figure 1 – Total score for each RCI-10 question

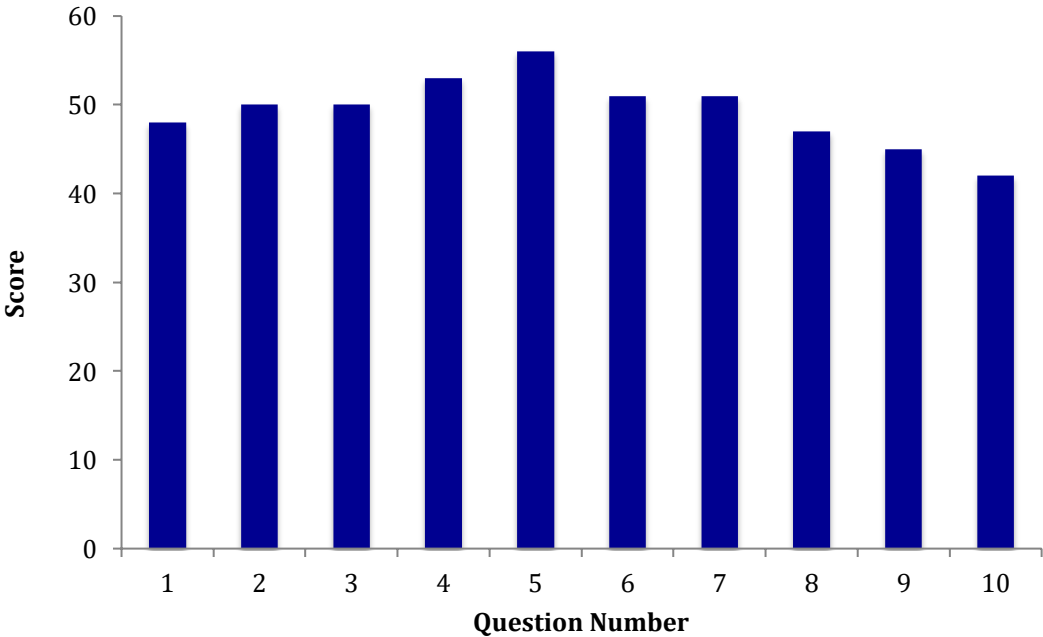

Supplementary Figure 2 - Intrinsic and extrinsic religiosity as a percentage of each participant's total score.

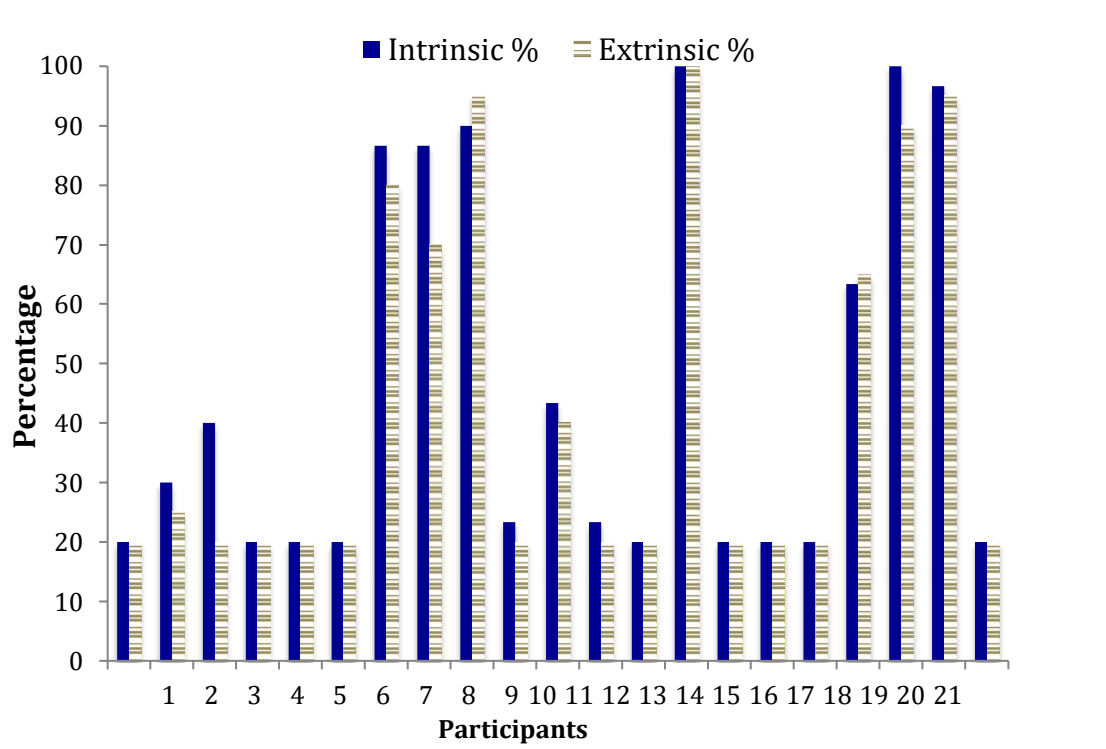



Supplementary Figure 3– Distress score with increasing age

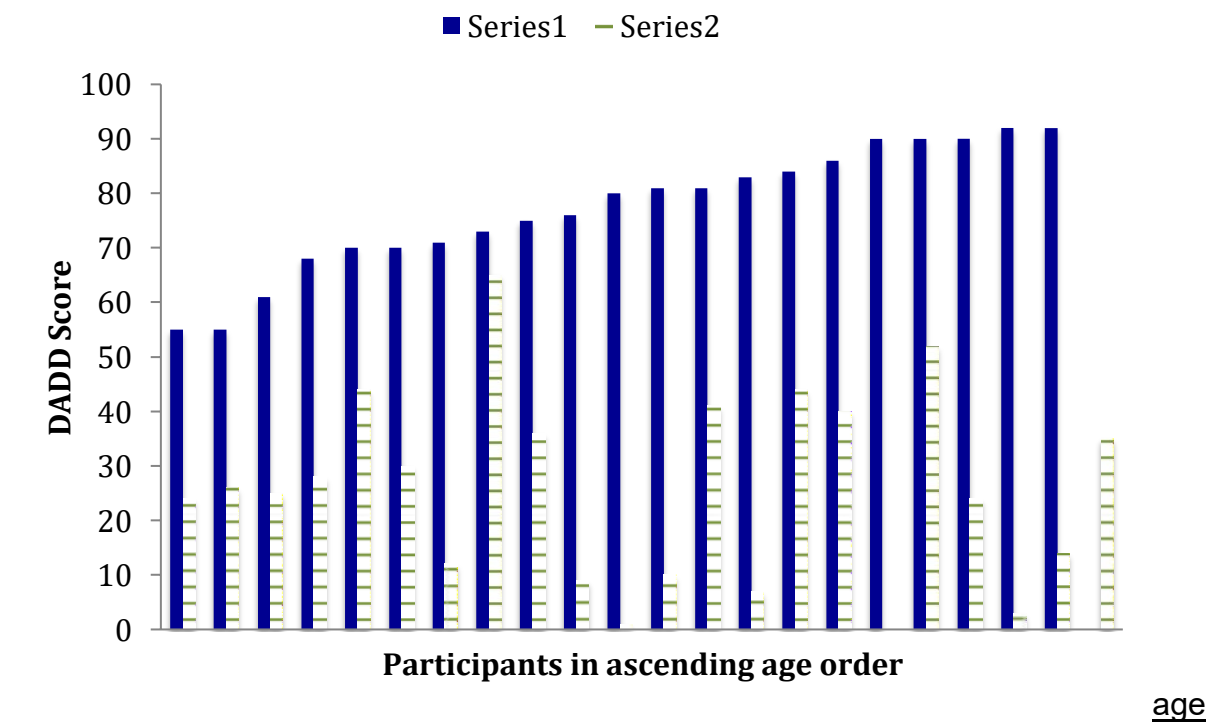

Supplementary Figure 7– Hope Herth Index score for each question

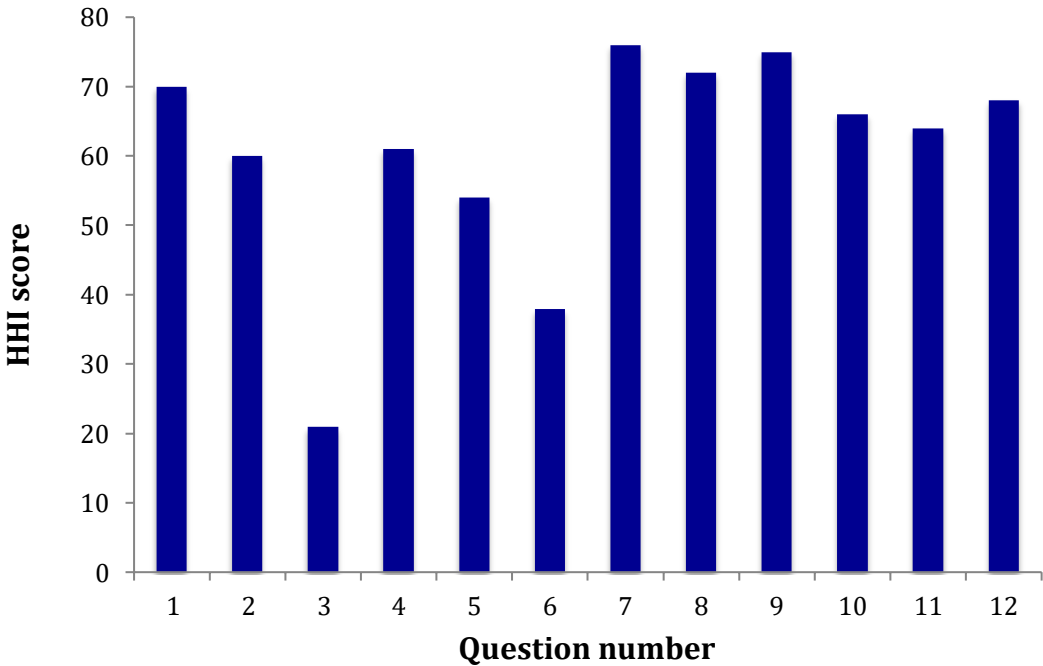

Supplementary Figure 4– Scatter graph Distress v Hope

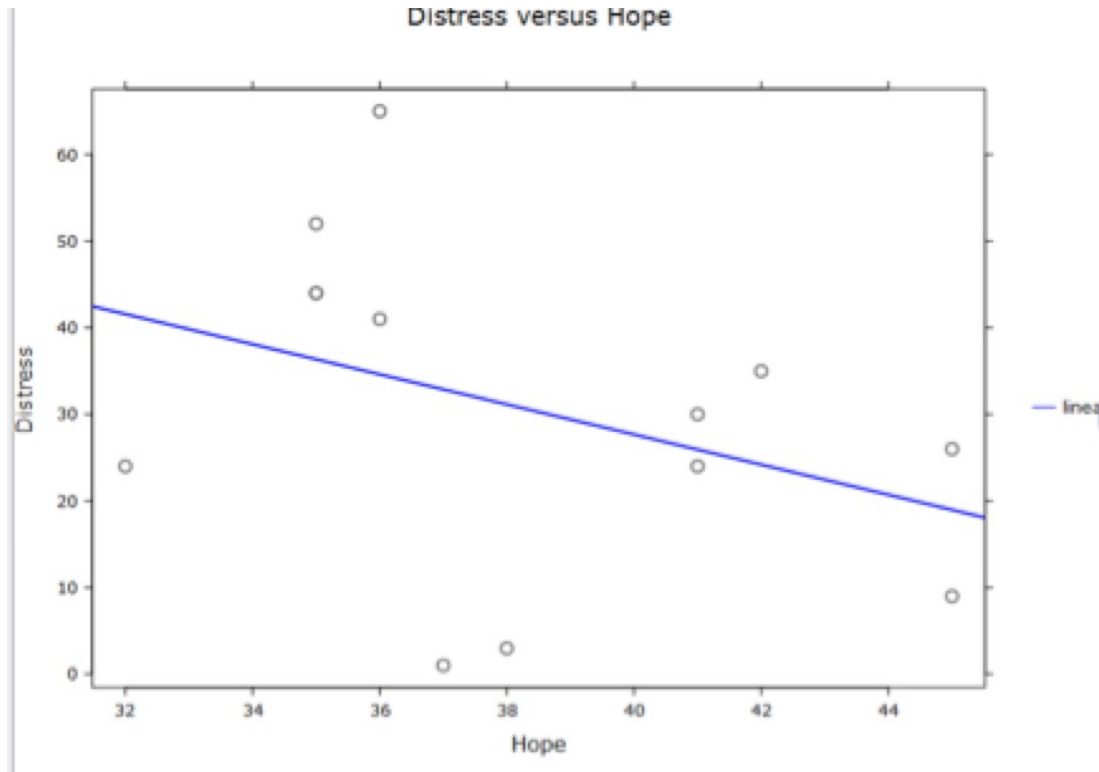

Supplementary Figure 5- Scatter graph Hope v. Religiosity

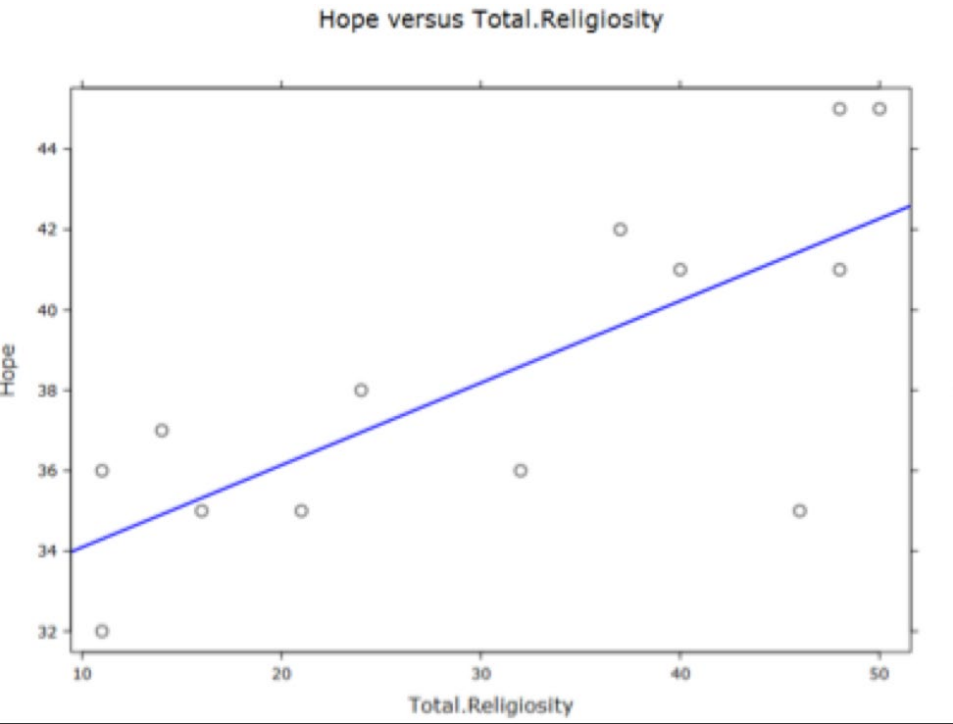

Supplement: Supplementary file 1 [file 20152538]
